# Supplementary material
Source: MDPI journal article supplement (https://www.mdpi.com/2227-7102/12/9/586)
Supplement: s1 [file s1 › education-1804992-supplementary.pdf]

# PEARLS Project Proposal Form

## PEARLS Mission Statement:

*We devised this event to incite innovation within our community by creating awareness for Diversity, Equity & Inclusion (DEI) and engaging, activating, and inspiring solutions that advance DEI.*

*Our vision is to inspire transformative work that dismantles inequities in medicine and to build an institutional process of unity, learning, and advancement towards justice.*

## Objective(s):

List the objective(s) of your project in bulleted form

## Background & Rationale: (300-word limit)

Be sure to describe how this project represents the implementation of new insight or ideas and potential benefits to DEI. Please include how your project connects to the PEARLS mission statement.

## Methods (numbered list):

**Describe how your project will achieve your project objective(s). Which community or group will your project impact? (100-word limit)**

**What are some anticipated challenges and how will you overcome them? (100-word limit):**

## Budget:

This funding application is for a \$XX grant. Please complete the following table on how you will spend this fund. If your total project budget is above \$XX, please describe your plan for obtaining additional funding in the text box following the table. If you are applying for your capstone project, you will not receive the grant but please complete the budget form according to your capstone budget:

*Table courtesy of SRCC Curriculum:*

| Project Budget Planning Worksheet |                        |          |      |      |                        |
|-----------------------------------|------------------------|----------|------|------|------------------------|
|                                   |                        | ITEM     | COST | DATE | REASON FOR EXPENDITURE |
|                                   | MATERIALS/<br>EXPENSES |          |      |      |                        |
|                                   |                        |          |      |      |                        |
|                                   |                        |          |      |      |                        |
|                                   |                        |          |      |      |                        |
|                                   |                        |          |      |      |                        |
|                                   |                        |          |      |      |                        |
|                                   |                        |          |      |      |                        |
|                                   |                        | Subtotal |      |      |                        |
|                                   |                        |          |      |      |                        |

|  |                 |          |  |  |  |
|--|-----------------|----------|--|--|--|
|  | EQUIPMENT       |          |  |  |  |
|  |                 |          |  |  |  |
|  |                 |          |  |  |  |
|  |                 |          |  |  |  |
|  |                 |          |  |  |  |
|  |                 |          |  |  |  |
|  |                 |          |  |  |  |
|  |                 | Subtotal |  |  |  |
|  |                 |          |  |  |  |
|  | TRAVEL          |          |  |  |  |
|  |                 |          |  |  |  |
|  |                 |          |  |  |  |
|  |                 |          |  |  |  |
|  |                 |          |  |  |  |
|  |                 |          |  |  |  |
|  |                 |          |  |  |  |
|  |                 | Subtotal |  |  |  |
|  |                 |          |  |  |  |
|  | OTHER           |          |  |  |  |
|  |                 |          |  |  |  |
|  |                 |          |  |  |  |
|  |                 |          |  |  |  |
|  |                 |          |  |  |  |
|  |                 |          |  |  |  |
|  |                 |          |  |  |  |
|  |                 | Subtotal |  |  |  |
|  |                 |          |  |  |  |
|  | PROJECT TOTAL   |          |  |  |  |
|  |                 |          |  |  |  |
|  | PROJECT BUDGET  |          |  |  |  |
|  |                 |          |  |  |  |
|  | REMAINING FUNDS |          |  |  |  |

**Estimated date of IRB approval (if applicable to your project!):**

**Projected Timeline:**

If your project is selected, there will be quarterly check-ins. We can meet with you to determine what things to have done at those check-ins. Please list what you anticipate having done at various time points in your project. These don’t have to be concrete deliverables and specific dates, but just an outline of the phases of your project.

**Describe the metrics and tools you will use to measure success and impact of your project:**

What support would you like to receive from EID-C to help facilitate your project and move it forward? Please describe in a few sentences or a paragraph (e.g., a brainstorm session with EID-C PEARLS team members on how to measure success of project).

Is there a way that your project can be expanded after you complete your portion? Is so, how?

Proposal grading rubric that will be used by PEARLS team to evaluate your submission:

PROJECT TITLE:  
APPLICANT NAME:

### Grand Rounds Proposal Scoring Rubric

| Criterion                                                        | 4<br>Exemplary                                                                                                                            | 3<br>Adequate                                                                                                                                     | 1<br>Needs Improvement                                                                                                                           | 0<br>Insufficient Evidence                                                                                          | Comments/Notes |
|------------------------------------------------------------------|-------------------------------------------------------------------------------------------------------------------------------------------|---------------------------------------------------------------------------------------------------------------------------------------------------|--------------------------------------------------------------------------------------------------------------------------------------------------|---------------------------------------------------------------------------------------------------------------------|----------------|
| Innovation                                                       | Project represents the implementation of new insight or idea, with potential benefits of change DEI made clear.                           | Project represents local implementation of emerging innovation or trend, with potential benefits to DEI specified.                                | Project represents practice(s) commonplace within DEI, or an adoption of a change with well-established benefits.                                | No innovation described or specific potential contribution to DEI defined.                                          |                |
| Justification                                                    | Strong rationale and significance of proposed work. Addresses specific need(s) common among peer institutions. Objectives clearly stated. | Rationale or significance of project tends toward the too-specific or too-general, but overall argument holds with vague/clear objectives.        | Weak presentation of institutional or community need, or tenuous argument for grant's ability to address need. Vague/clear objectives.           | Unconvincing or no evidence of need presented, or grant proposal does not address stated need. Vague objectives.    |                |
| Relationship to PEARLS Strategic Vision and/or Community's Goals | Project outcomes or activities align with both PEARLS vision and goals of greater community.                                              | Project elements align with goals of either the PEARLS or its greater community, but not both.                                                    | Project tangentially but not directly related to PEARLS strategic vision or community goals.                                                     | No explicit relationship between project and the agenda of PEARLS or community.                                     |                |
| Feasibility                                                      | Personnel, project activities timeline, and budget expenditures congruent with project description and outcomes.                          | Deficiencies or overestimations exist in personnel, timeline, or budget within tolerable range, outcomes appear achievable despite gaps or leaps. | Project's assembled personnel, timeline, or budget expose weaknesses in plan design. Outcomes unlikely to be achieved in project's current form. | Insufficient information about personnel, project activities timeline, or budget expenditures to gauge feasibility. |                |

PROJECT TITLE:  
APPLICANT NAME:

|                                  |                                                                                                                                                                                                                    |                                                                                                                                                |                                                                                                                          |                                                                                              |  |
|----------------------------------|--------------------------------------------------------------------------------------------------------------------------------------------------------------------------------------------------------------------|------------------------------------------------------------------------------------------------------------------------------------------------|--------------------------------------------------------------------------------------------------------------------------|----------------------------------------------------------------------------------------------|--|
| Efficiency of<br>Tactic/Approach | Project plan leverages or contributes to existing infrastructure or precedents. Design appears scalable or replicable.                                                                                             | Project plan overlooks or fails to mention important connections to relevant work by others, but redeemable. Represents a worthy contribution. | Project isolated from related work and duplicates effort. Extension or replication in current form unadvisable.          | Plan presented lacks sufficient detail to judge how it fits into industry or local contexts. |  |
| Assessment of<br>Impact          | Clear picture of how data will be collected and used to demonstrate degree to which outcomes are met.                                                                                                              | Good understanding of anticipated specific results or success, but plan lacks some details about data or methods.                              | Success difficult to ascertain, flawed by untestable outcomes, inappropriate methods, or lack of useful data collection. | Evaluation plans missing or unusable.                                                        |  |
| Sustainability                   | Evidence presented that project or its impact can be sustained locally beyond grant period, if results warrant. Also includes projects that are research-focused that can likely be carried on in future projects. | Project is temporary, designed to end when grant ends, or some effort to secure commitment beyond grant period is represented.                 | Plans for future are stated as assumptions without supporting arguments or evidence.                                     | No meaningful plans for future beyond funding term appear in proposal                        |  |
| <b>Total Score:</b>              |                                                                                                                                                                                                                    |                                                                                                                                                |                                                                                                                          |                                                                                              |  |
| Recommend<br>Funding?            | Yes                                                                                                                                                                                                                | No                                                                                                                                             |                                                                                                                          |                                                                                              |  |
| Additional<br>Comments           |                                                                                                                                                                                                                    |                                                                                                                                                |                                                                                                                          |                                                                                              |  |
